# Supplementary material for: Pathologically high intraocular pressure disturbs normal iron homeostasis and leads to retinal ganglion cell ferroptosis in glaucoma
Source: PubMed Central journal article supplement (PMC9883496; doi:10.1038/s41418-022-01046-4), 2022-08-06
Supplement: 41418_2022_1046_MOESM1_ESM.pdf [file 41418_2022_1046_MOESM1_ESM.pdf]

Please complete the table below to indicate the contributions of all named authors to the figures.

Figure 1:

|  |
|--|
|  |
|--|

Figure 2:

|  |
|--|
|  |
|--|

Figure 3:

|  |
|--|
|  |
|--|

Figure 4:

|  |
|--|
|  |
|--|

Figure 5:

|  |
|--|
|  |
|--|

Figure 6:

|  |
|--|
|  |
|--|

Signed for and on behalf of the Author(s):

Xiaodong Xia

Print Name:

|  |
|--|
|  |
|--|

Date:

|  |
|--|
|  |
|--|
